# Supplementary material for: Evaluation of Six Commercially Available Rapid Immunochromatographic Tests for the Diagnosis of Rabies in Brain Material
Source: PubMed Central journal article supplement (PMC4918935; doi:10.1371/journal.pntd.0004776), 2016-06-23
Supplement: pntd.0004776.s005.pdf [file pntd.0004776.s005.pdf]

**Supplementary Table 5: Results of tissue culture supernatant tested in 2008 using the Bionote LFD  
(Cat.No.:RG 18-01; Lot NO.:1801029)**

| <b>Virus</b> | <b>Titre<br/>(TCID50/ml)</b> | Undiluted | 1:10 | 1:100 | 1:1000 | 1:10000 | 1:100000 | 1:1000000 |
|--------------|------------------------------|-----------|------|-------|--------|---------|----------|-----------|
| CVS          | $10^{6.5}$                   | +         | -    | -     | -      | -       | -        | -         |
| EBLV-1       | $10^{6.2}$                   | +         | +    | -     | -      | -       | -        | -         |
| EBLV-2       | $10^{4.2}$                   | +         | -    | -     | -      | -       | -        | -         |
